# Supplementary material for: Emerging investigator series: chemical transformation of silver and zinc oxide nanoparticles in simulated human tear fluids: influence of biocoronae
Source: Royal Society of Chemistry journal article supplement (doi:10.1039/d1en00566a), 2021-01-01
Supplement: d1en00566a1.pdf [file d1en00566a1.pdf]

**Emerging investigator series: Chemical transformation of silver and zinc oxide nanoparticles  
in the simulated human tear fluids: Influence of biocorona**

Lingxiangyu Li,<sup>\*,†</sup> Ashfeen Ubaid Khan,<sup>‡</sup> Xiang Zhang,<sup>#,§,†</sup> Xiaoting Qian,<sup>‡</sup> and Yawei Wang<sup>†,#,§</sup>

<sup>†</sup> School of Environment, Hangzhou Institute for Advanced Study, University of Chinese Academy of Sciences, Hangzhou 310024, China

<sup>‡</sup> Department of Chemistry, Zhejiang Sci-Tech University, Hangzhou 310018, China

<sup>#</sup> State Key Laboratory of Environmental Chemistry and Ecotoxicology, Research Center for Eco-Environmental Sciences, Chinese Academy of Sciences, Beijing 100085, China

<sup>§</sup> College of Resources and Environment, University of Chinese Academy of Sciences, Beijing 100049, China

**Corresponding Author:**

\* Dr. Lingxiangyu Li

E-mail: [lingxiangyu.li@ucas.ac.cn](mailto:lingxiangyu.li@ucas.ac.cn)

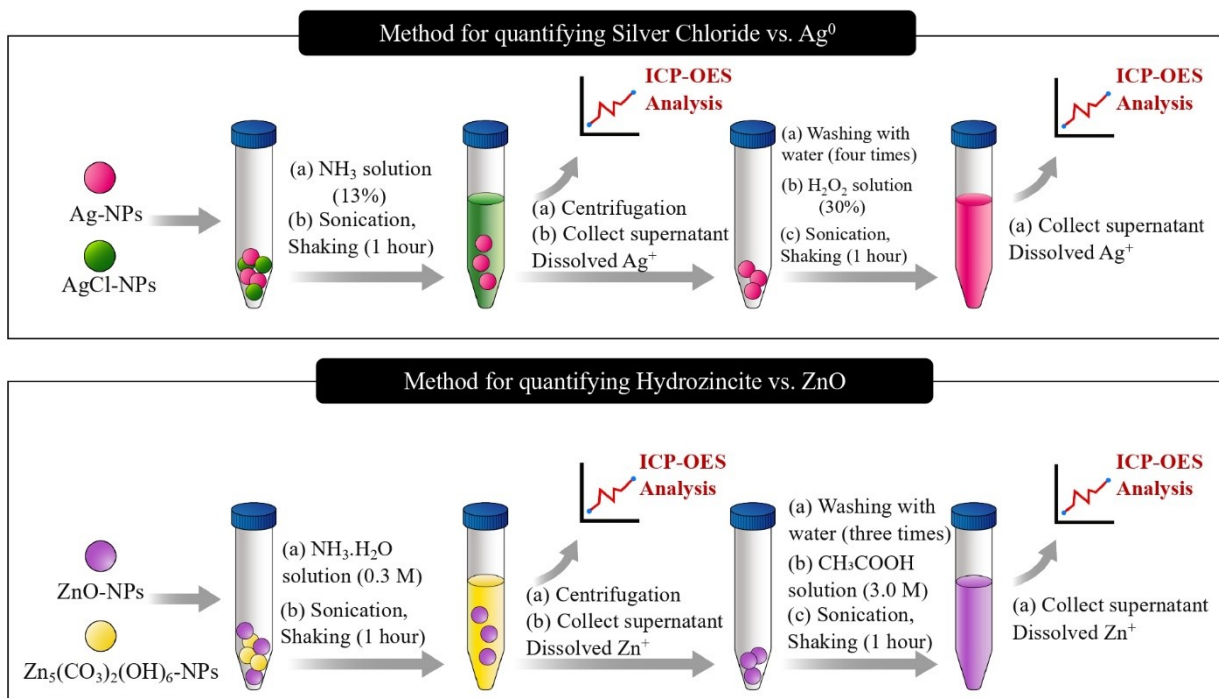

**Scheme S1.** Schematic representation of the experimental procedure for the selective dissolution of AgCl-NPs against Ag-NPs or Zn<sub>5</sub>(CO<sub>3</sub>)<sub>2</sub>(OH)<sub>6</sub>-NPs against ZnO-NPs.

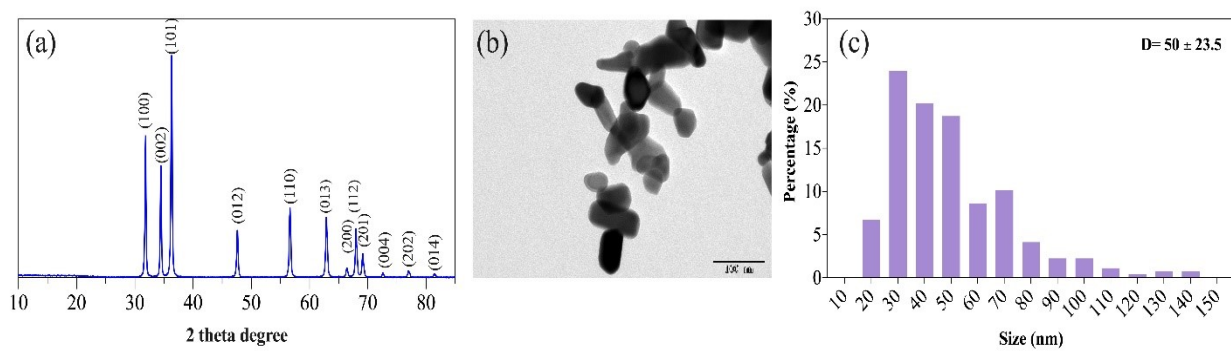

**Figure S1.** Physicochemical characterization of pristine ZnO-NPs used in this study.

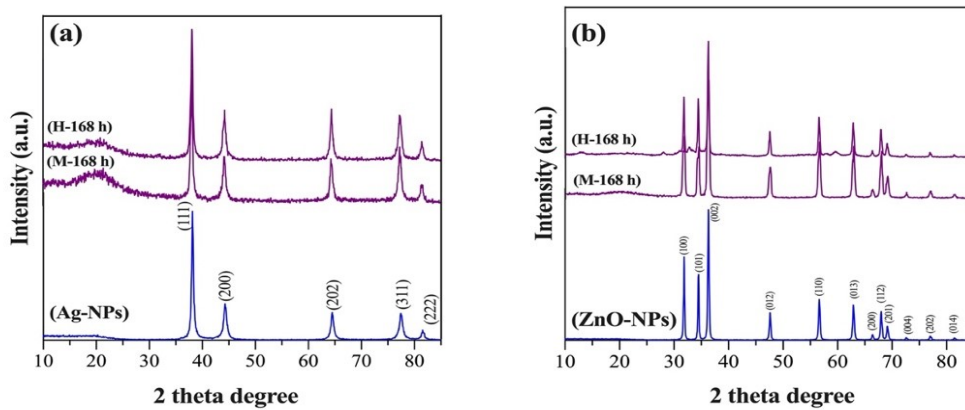

**Figure S2.** XRD spectra of pristine Ag-NPs and ZnO-NPs and their transformed products from the STF-1 with middle and high particle loadings. (a) Ag-NPs. (b) ZnO-NPs.

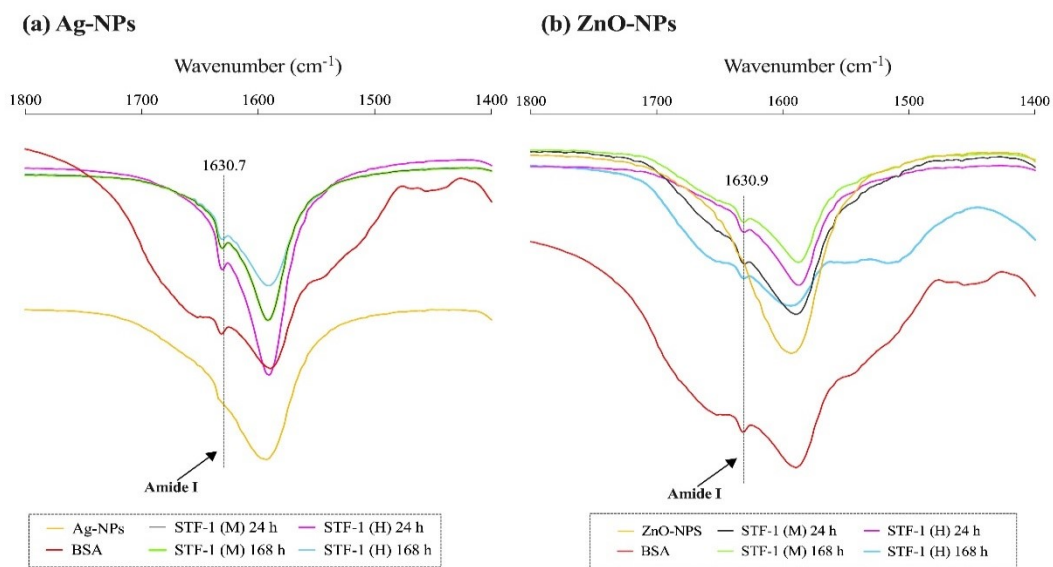

**Figure S3.** FT-IR spectra of precipitate collected from the STF-1 with Ag-NPs or ZnO-NPs. (a) Ag-NPs. (b) ZnO-NPs.

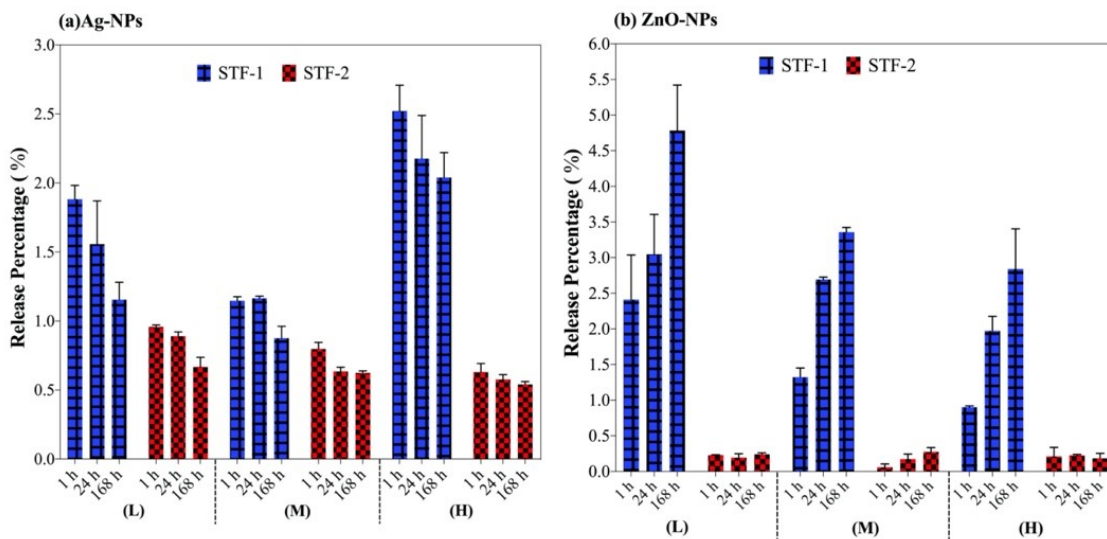

**Figure S4.** The dissolution of Ag-NPs and ZnO-NPs in the simulated tear fluids. The percentage represented the dissolved ions accounting for nanoparticles added at the beginning of exposure.

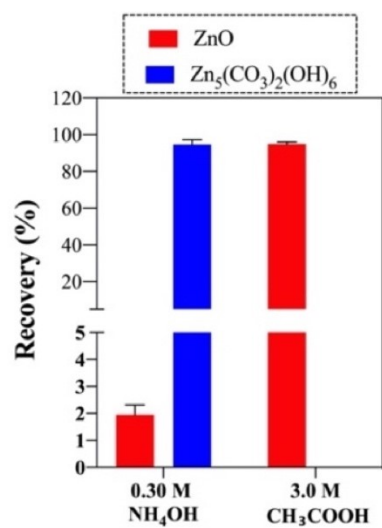

**Figure S5.** Selective dissolution of Zn<sub>5</sub>(CO<sub>3</sub>)<sub>2</sub>(OH)<sub>6</sub> against ZnO by using ammonia solution (0.3 M) and acetic acid solution (3.0 M).

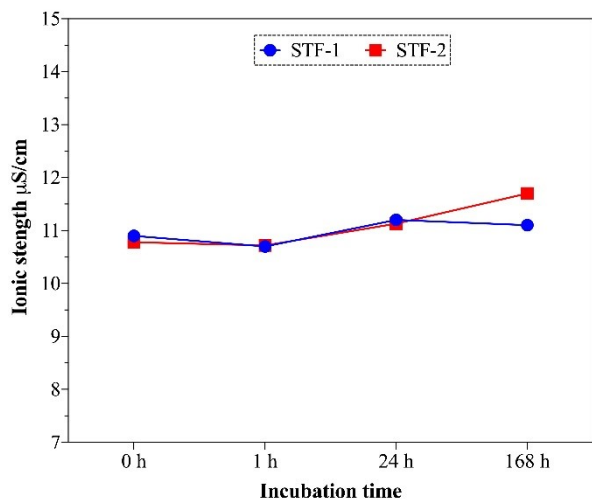

**Figure S6.** Ionic strength of STF-1 and STF-2 as a function of incubation time.



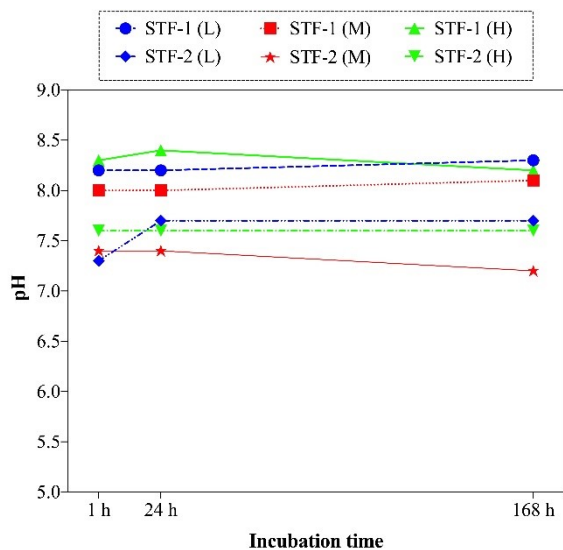

**Figure S7.** pH of STF-1 and STF-2 as a function of incubation time.

**Table S1.** Composition of the simulated tear fluids used in this study

| Chemical composition | Concentration (g/L)         |                             |
|----------------------|-----------------------------|-----------------------------|
|                      | STF-1 (pH 8.0) <sup>1</sup> | STF-2 (pH 7.4) <sup>2</sup> |
| Sodium bicarbonate   | 2.18                        | 1.924                       |
| Sodium chloride      | 6.78                        | 6.782                       |
| Potassium chloride   | 1.38                        | 1.11                        |
| Calcium chloride     | 0.0084                      | 0.0024                      |
| Albumin (BSA)        | 6.69                        |                             |
| Glucose              | 0.025                       |                             |

**Table S2.** sp-ICP-MS instrumental and analytical details.

| Parameter group  | Parameter              | Parameter value                           |
|------------------|------------------------|-------------------------------------------|
| ICP-MS component | ICP-MS model           | Agilent 7900                              |
|                  | Nebulizer              | MicroMist, glass                          |
|                  | Spray chamber          | Quartz                                    |
| ICP-MS settings  | RF power               | 1550 W                                    |
|                  | Nebulizer gas flow     | 1.00 L/min                                |
|                  | Sample flow rate       | 0.270 mL/min                              |
|                  | Dwell time             | 100 $\mu$ s                               |
|                  | Total acquisition time | 60 s                                      |
|                  | Data acquisition mode  | TRA                                       |
| Reaction gas     | No gas                 | $^{107}\text{Ag}^+$ , $^{197}\text{Au}^+$ |
|                  | He                     | $^{66}\text{Zn}^+$                        |

TE (%): 6.8-8.5

## References

1. Hedberg, Y.; Gustafsson, J.; Karlsson, H. L.; Moller, L.; Wallinder, I. O. Bioaccessibility, bioavailability and toxicity of commercially relevant iron- and chromium-based particles: in vitro studies with an inhalation perspective. *Part. Fibre. Toxicol.* 2010, 7, 23.
2. Margues, M. R. C.; Loebenberg, R.; Almukainzi, M. Simulated biological fluids with possible application in dissolution testing. *Dissolut. Technol.* 2011, 18, 15-28.
